# Supplementary material for: Neuronal segmentation in cephalopod arms
Source: Springer Nature journal article supplement (doi:10.1038/s41467-024-55475-5), 2025-01-15
Supplement: MOESM3 [file 41467_2024_55475_MOESM3_ESM.pdf › 41467_2024_55475_MOESM3_ESM.pdf]

## **Description of Additional Supplementary Files**

**File Name:** Supplementary Movie 1

**Description:** Cinematic depiction of arm and sucker movements in *Octopus bimaculoides*
