# Supplementary material for: Neuronal segmentation in cephalopod arms
Source: Springer Nature journal article supplement (doi:10.1038/s41467-024-55475-5), 2025-01-15
Supplement: MOESM7 [file 41467_2024_55475_MOESM7_ESM.xlsx]

## Sheet: Fig 2k
X Values
Nerve 1	0	0.0217391	0.0434783	0.0652174	0.0869565	0.108696	0.130435	0.152174	0.173913	0.195652	0.217391	0.23913	0.26087	0.282609	0.304348	0.326087	0.347826	0.369565	0.391304	0.413043	0.434783	0.456522	0.478261	0.5	0.521739	0.543478	0.565217	0.586957	0.608696	0.630435	0.652174	0.673913	0.695652	0.717391	0.73913	0.76087	0.782609	0.804348	0.826087	0.847826	0.869565
Nerve 2	0	0.0217391	0.0434783	0.0652174	0.0869565	0.108696	0.130435	0.152174	0.173913	0.195652	0.217391	0.23913	0.26087	0.282609	0.304348	0.326087	0.347826	0.369565	0.391304	0.413043	0.434783	0.456522	0.478261	0.5	0.521739
Nerve 3	0	0.0217391	0.0434783	0.0652174	0.0869565	0.108696	0.130435	0.152174	0.173913	0.195652	0.217391	0.23913	0.26087	0.282609	0.304348	0.326087	0.347826	0.369565	0.391304	0.413043	0.434783	0.456522	0.478261	0.5	0.521739	0.543478	0.565217	0.586957	0.608696	0.630435	0.652174	0.673913	0.695652	0.717391	0.73913	0.76087	0.782609	0.804348	0.826087
Nerve 4	0	0.0217391	0.0434783	0.0652174	0.0869565	0.108696	0.130435	0.152174	0.173913	0.195652	0.217391	0.23913	0.26087	0.282609	0.304348	0.326087	0.347826	0.369565	0.391304	0.413043	0.434783
Nerve 5	0	0.0217391	0.0434783	0.0652174	0.0869565	0.108696	0.130435	0.152174	0.173913	0.195652	0.217391	0.23913	0.26087	0.282609	0.304348	0.326087	0.347826	0.369565	0.391304	0.413043	0.434783	0.456522	0.478261	0.5	0.521739	0.543478	0.565217
Nerve 6	0	0.0217391	0.0434783	0.0652174	0.0869565	0.108696	0.130435	0.152174	0.173913	0.195652	0.217391	0.23913	0.26087	0.282609	0.304348	0.326087	0.347826	0.369565	0.391304	0.413043	0.434783	0.456522	0.478261	0.5	0.521739	0.543478	0.565217	0.586957	0.608696	0.630435	0.652174	0.673913	0.695652	0.717391	0.73913	0.76087	0.782609	0.804348	0.826087	0.847826	0.869565	0.891304	0.913043	0.934783	0.956522	0.978261	1
Nerve 7	0	0.0217391	0.0434783	0.0652174	0.0869565	0.108696	0.130435	0.152174	0.173913	0.195652	0.217391	0.23913	0.26087	0.282609	0.304348	0.326087	0.347826	0.369565	0.391304	0.413043	0.434783	0.456522	0.478261	0.5	0.521739	0.543478	0.565217	0.586957	0.608696	0.630435
Nerve 8	0	0.0217391	0.0434783	0.0652174	0.0869565	0.108696	0.130435	0.152174	0.173913	0.195652	0.217391	0.23913	0.26087	0.282609	0.304348	0.326087	0.347826	0.369565	0.391304	0.413043	0.434783	0.456522	0.478261	0.5	0.521739	0.543478	0.565217	0.586957	0.608696	0.630435	0.652174	0.673913	0.695652	0.717391	0.73913	0.76087	0.782609	0.804348	0.826087	0.847826	0.869565	0.891304	0.913043
Nerve 9	0	0.0217391	0.0434783	0.0652174	0.0869565	0.108696	0.130435	0.152174	0.173913	0.195652	0.217391	0.23913	0.26087	0.282609	0.304348	0.326087	0.347826	0.369565	0.391304	0.413043	0.434783	0.456522	0.478261	0.5	0.521739	0.543478	0.565217
Y Values
Nerve 1	1	1	2	2.42141	2.82536	3.11085	3.30769	3.44132	3.53311	3.60064	3.65794	3.71578	3.78192	3.86142	3.95687	4.0687	4.19538	4.33379	4.4794	4.62661	4.76895	4.89942	5.01071	5.09551	5.14674	5.15785	5.12307	5.03771	4.89839	4.70335	4.45269	4.14864	3.79588	3.40174	2.97651	2.53371	2	1.6672	1	1	1
Nerve 2	1	1	1	1.73586	2	2.35127	2.69103	3.05086	3.42155	3.78904	4.13593	4.44293	4.69032	4.85944	4.93414	4.90229	4.75718	4.49906	4.13657	3.68823	3.18389	2.66622	2	2	1.68296
Nerve 3	2	2	2	2	2.30175	2.56909	2.90142	3.28124	3.69226	4.1194	4.54881	4.96787	5.36523	5.73076	6.05563	6.33228	6.55445	6.71718	6.81681	6.85102	6.81882	6.72056	6.55796	6.33409	6.05343	5.72181	5.3465	4.93615	4.50085	4.05212	3.60292	3.16768	2.76227	2.40407	2	2	2	2	2
Nerve 4	1	1	1	1	1	1	1	1.73345	2.45743	3.27154	4.06562	4.72673	5.15433	5.27553	5.06032	4.53681	3.80643	3.0592	2.58895	2.80853	4.26505
Nerve 5	1	1	1	1	1	1	1	1	1	1	1	1	1	1	1	2	3.00934	4.2321	5.30969	6.01439	6.16588	5.67131	4.56536	3.05032	1	1	1
Nerve 6	1	1	1	1	1	1	1	1	1	1	1	1	1	1	1	1	1	1	1	1	1	1	1	1	1	1	1	1	1	1	1	1	1	1	1	1	1	1	1	1	1	1	1	1	1	1	1
Nerve 7	1	1	1	1	1	1	1	1.72527	2	2.51077	2.92242	3.31566	3.66732	3.95557	4.16092	4.26727	4.26297	4.14178	3.904	3.55744	3.11845	2.61302	2	1	1	1	1	1	1	1
Nerve 8	2	2	2	2	2	2.35111	2.49508	2.68282	2.91506	3.18995	3.50343	3.84945	4.22036	4.60711	4.99964	5.3871	5.75819	6.10147	6.40562	6.65975	6.85373	6.97844	7.0261	6.99056	6.86758	6.65516	6.35383	5.96691	5.50088	4.96561	4.37467	3.74569	3.10056	2.4658	2	1	1	1	1	1	1	1	1
Nerve 9	1	1	1	1	1	1	1	1	1.66906	2	2.46081	2.93735	3.41718	3.85752	4.21568	4.45237	4.53507	4.44131	4.16204	3.70496	3.09782	2.39178	1.66474	1	1	1	1

## Sheet: Fig S4f
X Values
Nerve d	0	0.0217391	0.0434783	0.0652174	0.0869565	0.108696	0.130435	0.152174	0.173913	0.195652	0.217391	0.23913	0.26087	0.282609	0.304348	0.326087	0.347826	0.369565	0.391304	0.413043	0.434783	0.456522	0.478261	0.5	0.521739	0.543478	0.565217	0.586957	0.608696
Nerve e	0	0.0217391	0.0434783	0.0652174	0.0869565	0.108696	0.130435	0.152174	0.173913	0.195652	0.217391	0.23913	0.26087	0.282609	0.304348	0.326087	0.347826	0.369565	0.391304	0.413043	0.434783	0.456522	0.478261	0.5	0.521739	0.543478	0.565217	0.586957
Y Values
Nerve d	1	1.99148	3.20422	3.7002	3.72522	3.48007	3.12422	2.77931	2.53278	2.44143	2.53501	2.81982	3.28224	3.89238	4.60759	5.3761	6.14057	6.84167	7.42169	7.82809	8.01708	7.95723	7.63304	7.04851	6.23072	5.23343	4.14064	3.0702	2.17736
Nerve e	1	2.91218	4.23652	4.42667	3.98895	3.31263	2.68166	2.28636	2.23508	2.56595	3.25854	4.24557	5.4246	6.66973	7.84332	8.80763	9.43658	9.62739	9.31234	8.4704	7.13898	5.42558	3.51954	1.70369	1	1	1	1

## Sheet: Fig S4g
X Values
Nerve d	0	0.386438
Nerve e	0	0.22008
Y Values
Nerve d	0	0.25556
Nerve e	0	0.399497

## Sheet: Fig S4j
X Values
Nerve h	0	0.0217391	0.0434783	0.0652174	0.0869565	0.108696	0.130435	0.152174	0.173913	0.195652	0.217391	0.23913	0.26087	0.282609	0.304348	0.326087	0.347826	0.369565	0.391304	0.413043	0.434783	0.456522	0.478261	0.5	0.521739	0.543478	0.565217	0.586957	0.608696	0.630435	0.652174	0.673913	0.695652	0.717391	0.73913	0.76087	0.782609	0.804348	0.826087
Nerve i	0	0.0217391	0.0434783	0.0652174	0.0869565	0.108696	0.130435	0.152174	0.173913	0.195652	0.217391	0.23913	0.26087	0.282609	0.304348	0.326087	0.347826	0.369565	0.391304	0.413043	0.434783	0.456522	0.478261	0.5	0.521739	0.543478	0.565217	0.586957	0.608696	0.630435	0.652174	0.673913	0.695652	0.717391	0.73913	0.76087	0.782609	0.804348	0.826087	0.847826	0.869565	0.891304	0.913043
Y Values
Nerve h	2	2	2	2	2.30175	2.56909	2.90142	3.28124	3.69226	4.1194	4.54881	4.96787	5.36523	5.73076	6.05563	6.33228	6.55445	6.71718	6.81681	6.85102	6.81882	6.72056	6.55796	6.33409	6.05343	5.72181	5.3465	4.93615	4.50085	4.05212	3.60292	3.16768	2.76227	2.40407	2	2	2	2	2
Nerve i	2	2	2	2	2	2.35111	2.49508	2.68282	2.91506	3.18995	3.50343	3.84945	4.22036	4.60711	4.99964	5.3871	5.75819	6.10147	6.40562	6.65975	6.85373	6.97844	7.0261	6.99056	6.86758	6.65516	6.35383	5.96691	5.50088	4.96561	4.37467	3.74569	3.10056	2.4658	2	1	1	1	1	1	1	1	1

## Sheet: Fig S4k
X Values
Nerve h	0	0.324606
Nerve i	0	0.271929
Y Values
Nerve h	0	-0.330654
Nerve i	0	-0.473855

## Sheet: Fig S7i
X Values
Ex Tips	-0.136486	-0.343528	-0.127575	0.0899349	0.0109855	-0.846774	-0.69354	-0.961019	-0.414271	-0.830166	-0.982738	-0.891982
In Tips	0.996795	0.999308	0.85878	0.626456	0.900099	0.798982	0.399939	0.35292
Y Values
Ex Tips	-0.990642	0.939142	0.991829	-0.995948	0.99994	0.531952	0.720418	0.276482	-0.910153	-0.557516	-0.185002	-0.452071
In Tips	-0.0799961	0.0371953	0.512344	0.779457	-0.435685	-0.601354	-0.916542	0.935653

## Sheet: Fig S7j
X Values
Ex Tips	-0.968602	-0.999961	-0.12796	-0.398207	-0.515739	-0.40643	-0.9688	-0.862841	-0.687312	-0.929164	0.0721394	-0.0925947	-0.820375	0.067388	0.313546
In Tips	0.878301	0.94454	0.802671	0.919627	0.571989	0.997241	0.982032	0.298501	0.929913
Y Values
Ex tips	0.248617	-0.00879803	0.991779	-0.917295	-0.856746	0.913682	-0.247842	-0.505476	0.726362	0.369667	-0.997395	-0.995704	0.571826	0.997727	0.949573
In Tips	-0.478108	0.328396	0.596422	0.392792	0.820261	0.074227	-0.188715	-0.954409	-0.367781
